# Supplementary material for: Transport of probe particles in a polymer network: effects of probe size, network rigidity and probe–polymer interaction
Source: Royal Society of Chemistry journal article supplement (doi:10.1039/c9sm01822k), 2019-01-01
Supplement: c9sm01822k5.pdf [file c9sm01822k5.pdf]

# Electronic Supplementary Information: Transport of probe particles in polymer network: effects of probe size, network rigidity and probe-polymer interaction

Praveen Kumar, Ligesh Theeyancheri, Subhasish Chaki and Rajarshi Chakrabarti\*

*Department of Chemistry, Indian Institute of Technology Bombay,*

*Mumbai, Powai 400076, E-mail: [rajarshi@chem.iitb.ac.in](mailto:rajarshi@chem.iitb.ac.in)*

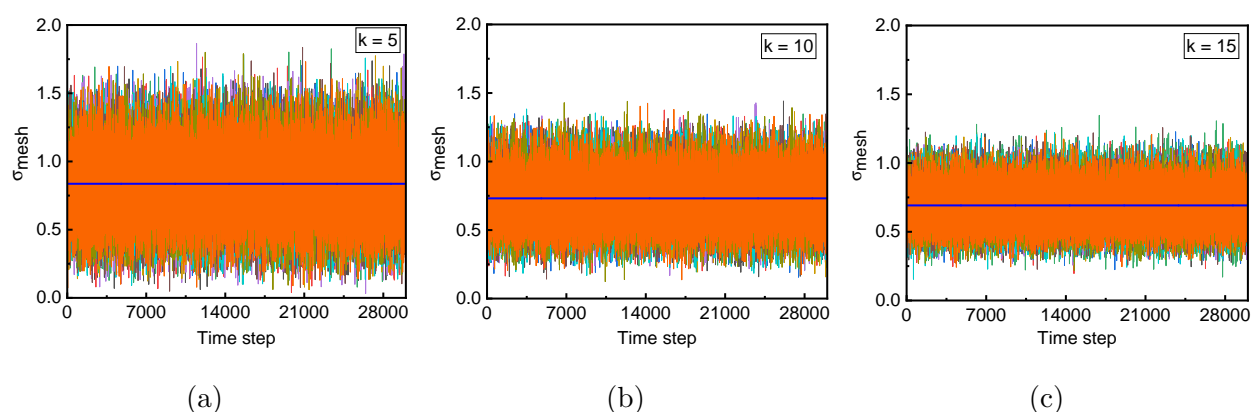

FIG. S1: Plots of the mesh size ( $\sigma_{\text{mesh}}$ ) vs time step for different stiffness  $k = 5, 10, 15$ .  
The blue line represents the average mesh size.

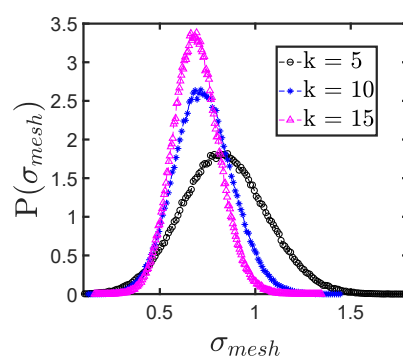

FIG. S2: Distribution  $P(\sigma_{\text{mesh}})$  of the mesh size for different stiffness  $k = 5, 10, 15$ .

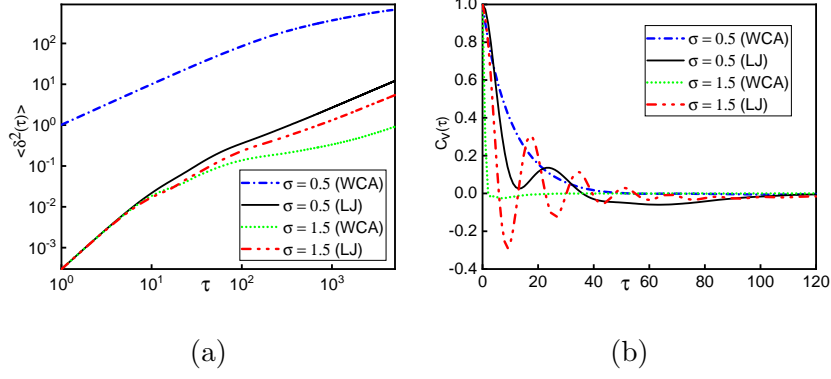

FIG. S3: Plots of  $\langle \delta^2(\tau) \rangle$  (a) and VACF ( $C_v(\tau)$ ) (b) vs lag-time  $\tau$  for WCA and LJ ( $\epsilon = 2$ ) with different size of the tracer particle  $\sigma = 0.5, 1.5$  for stiffness  $k = 5$ .

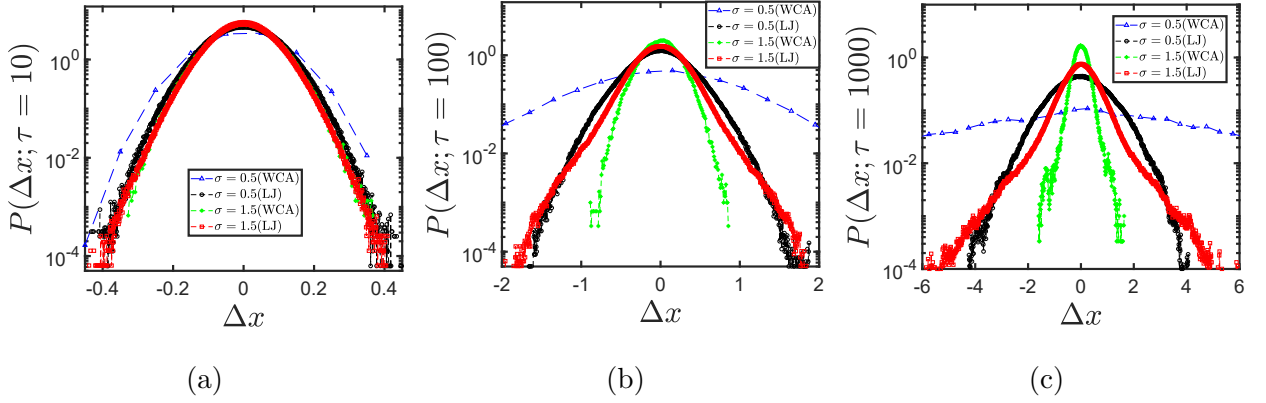

FIG. S4: Plots of the self part of the van-Hove functions in  $x$ ,  $P(\Delta x; \tau)$  for three chosen lag-times  $\tau$  (100, 1000, 10000) for WCA and LJ ( $\epsilon = 2$ ) with different size of the tracer particle  $\sigma = 0.5, 1.5$  for stiffness  $k = 5$ .

**File Name:** Supplementary Movie 1

**Description:** Molecular dynamics simulation of probe particles with binding affinity ( $\epsilon = 2$ ) in polymer network (blue) of stiffness  $k = 5$ . The dynamics of the bigger tracer (red) with size  $\sigma = 1.5$  becomes slower than the relatively smaller tracer (green) with size  $\sigma = 0.5$ .

**File Name:** Supplementary Movie 2

**Description:** Molecular dynamics simulation of probe particles with size  $\sigma = 0.5$  in polymer network (blue) of stiffness  $k = 5$ . The probe particle (red) with higher binding affinity ( $\epsilon = 5$ ) moves slowly as compared to the probe particle (green) with lower binding affinity ( $\epsilon = 2$ ).

**File Name:** Supplementary Movie 3

**Description:** Molecular dynamics simulation of probe particle (green) with binding affinity  $\epsilon = 2$  and  $\sigma = 0.5$  in polymer network (blue) of stiffness  $k = 5$ . Here the tracer is less caged as compared to the case for  $k = 15$ .

**File Name:** Supplementary Movie 4

**Description:** Molecular dynamics simulation of probe particle (green) with binding affinity  $\epsilon = 2$  and  $\sigma = 0.5$  in polymer network (silver) of stiffness  $k = 15$ . Here the tracer is caged.
